# Supplementary material for: Mechanical properties and behavior of the Ti–45Nb alloy subjected to extreme conditions
Source: Royal Society of Chemistry journal article supplement (doi:10.1039/d4ce00076e), 2024-01-01
Supplement: d4ce00076e1.pdf [file d4ce00076e1.pdf]

## Mechanical properties and behavior of the Ti-45Nb alloy subjected to extreme conditions

Dejan Zagorac<sup>a,\*</sup>, Dasari L.V.K. Prasad<sup>b,\*</sup>, Tamara Škundrić<sup>a</sup>, Kedar Yadav<sup>b</sup>, Surender Singh<sup>b</sup>,  
Slađana Laketić<sup>a</sup>, Jelena Zagorac<sup>a</sup>, Miloš Momčilović<sup>c</sup>, Ivana Cvijović-Alagić<sup>a,\*</sup>

<sup>a</sup> Center of Excellence „Center for Synthesis, Processing and Characterization of Materials for Application in Extreme Conditions - Cextreme Lab“, Vinča Institute of Nuclear Sciences - National Institute of the Republic of Serbia, University of Belgrade, Mike Petrovića Alasa 12-14, 11001 Belgrade, Serbia

<sup>b</sup> Department of Chemistry, Indian Institute of Technology, Kanpur 208016, India

<sup>c</sup> Department of Physical Chemistry, Vinča Institute of Nuclear Sciences - National Institute of the Republic of Serbia, University of Belgrade, Mike Petrovića Alasa 12-14, 11001 Belgrade, Serbia

## Supplementary Information

---

\* Corresponding authors.

Tel.: +381-11-3408-224; fax: +381-11-3408-224.

E-mail address: dzagorac@vinca.rs (Dejan Zagorac), ivanac@vin.bg.ac.rs (Ivana Cvijović-Alagić)

Tel.: +91-512-259-7295; fax: +91-512-259-6806

E-mail address: dprasad@iitk.ac.in (Dasari L. V. K. Prasad)

## Supplementary Figures

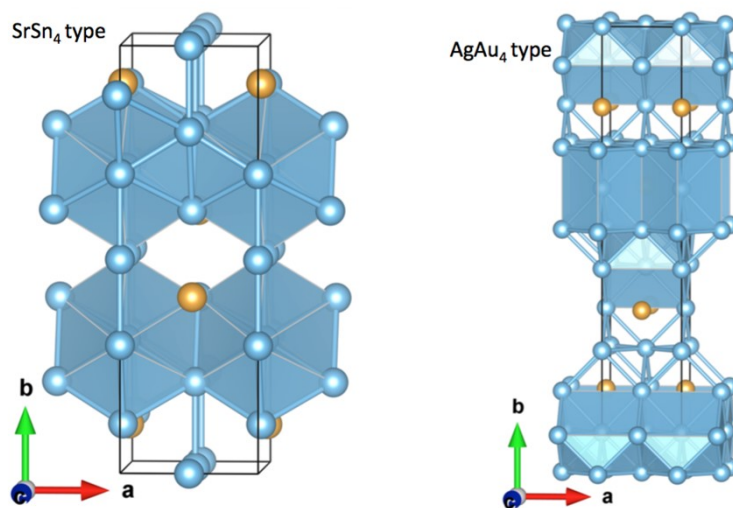

**Figure S1.** Different sublattice visualizations of both the SrSn<sub>4</sub> type and AgAu<sub>4</sub> Ti<sub>4</sub>Nb structure modifications.

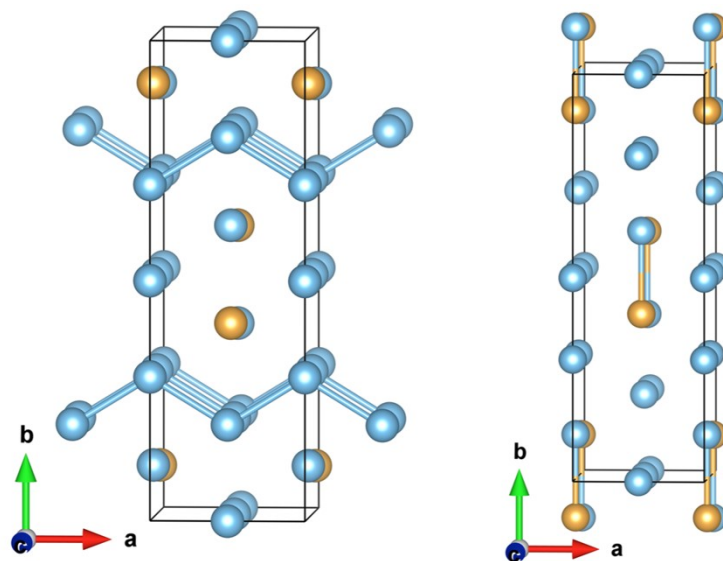

**Figure S2.** Shortest Ti-Ti and Nb-Ti inter-nuclear separations in SrSn<sub>4</sub> type Ti<sub>4</sub>Nb structure modification.

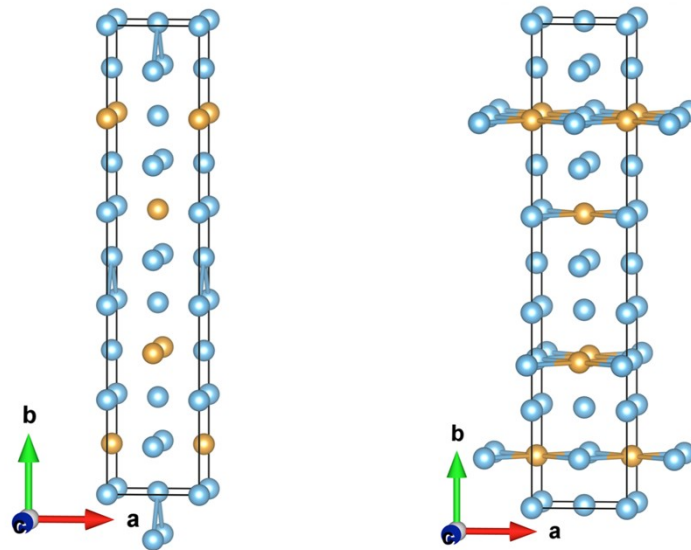

**Figure S3.** Shortest Ti-Ti and Nb-Ti inter-nuclear separations in AgAu<sub>4</sub> type of Ti<sub>4</sub>Nb structure modification.

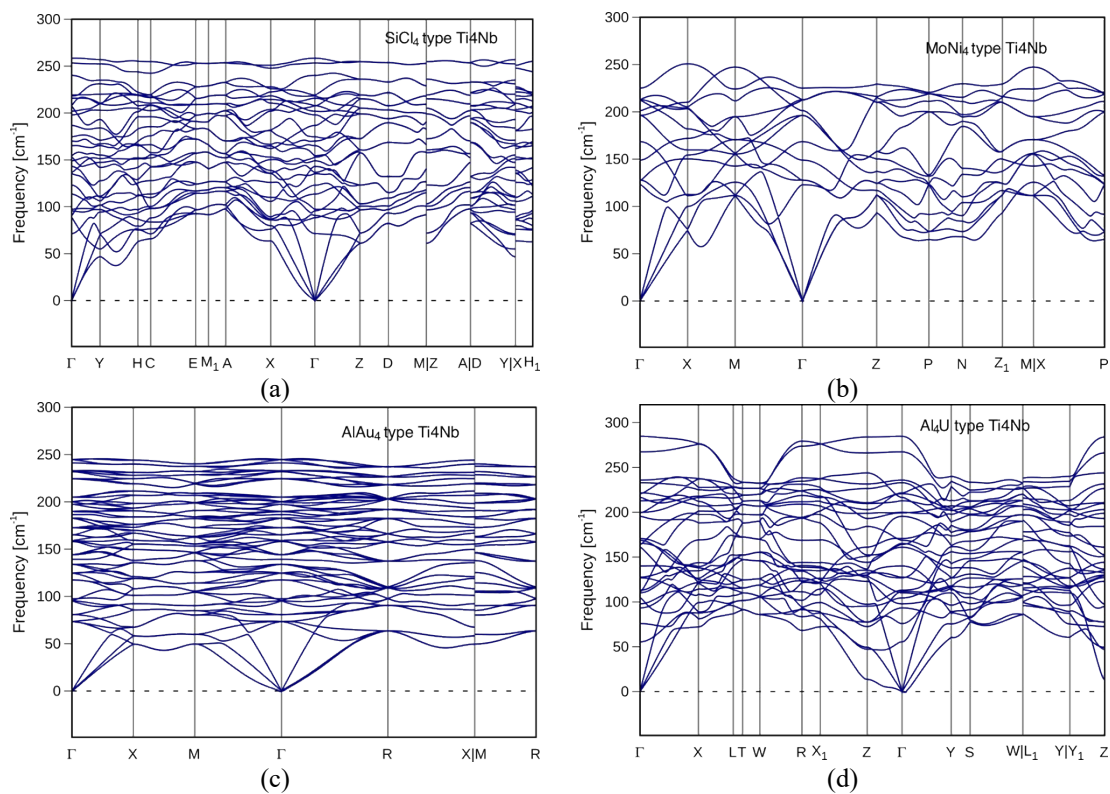

**Figure S4.** The calculated phonon dispersion spectra of (a) SiCl<sub>4</sub> type monoclinic  $P2_1/m$  (no. 11), (b) MoNi<sub>4</sub> type tetragonal  $I4/m$  (no. 87), (c) AlAu<sub>4</sub> type cubic  $P2_13$  (no. 198), and (d) Al<sub>4</sub>U type orthorhombic  $Imma$  (no. 74) Ti<sub>4</sub>Nb modifications.

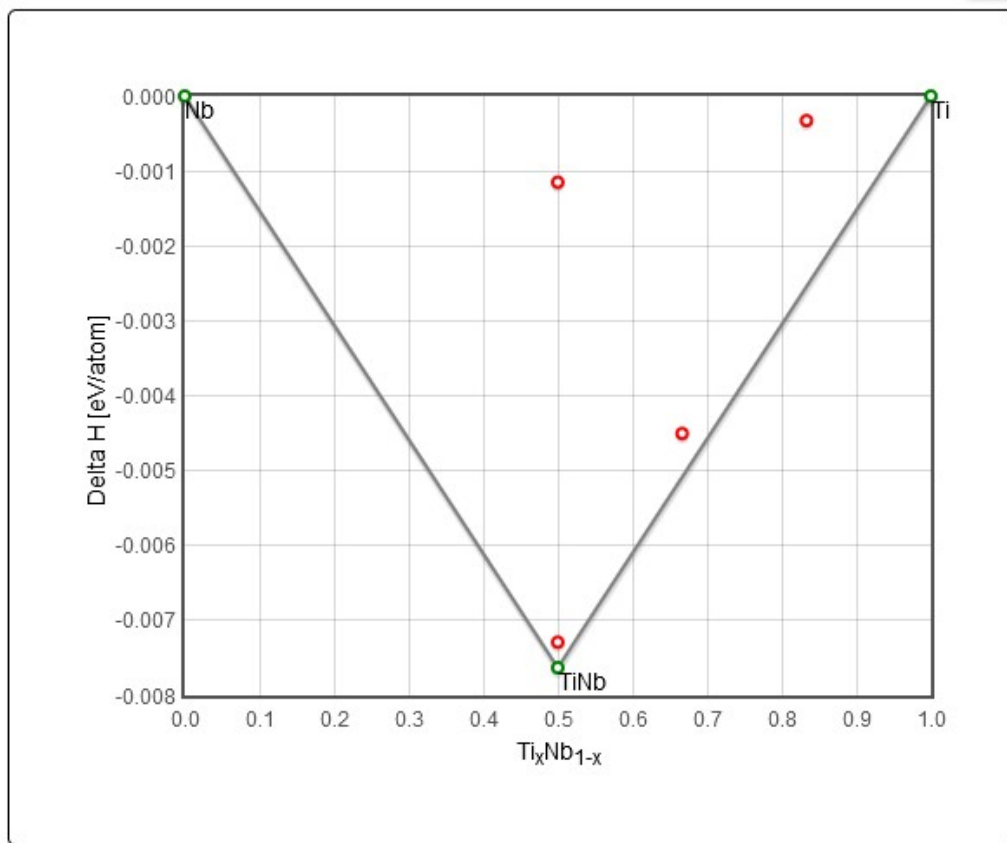

**Figure S5.** The phase diagram of Ti-Nb was explored using the Open Quantum Materials Database (OQMD) [S1,S2].

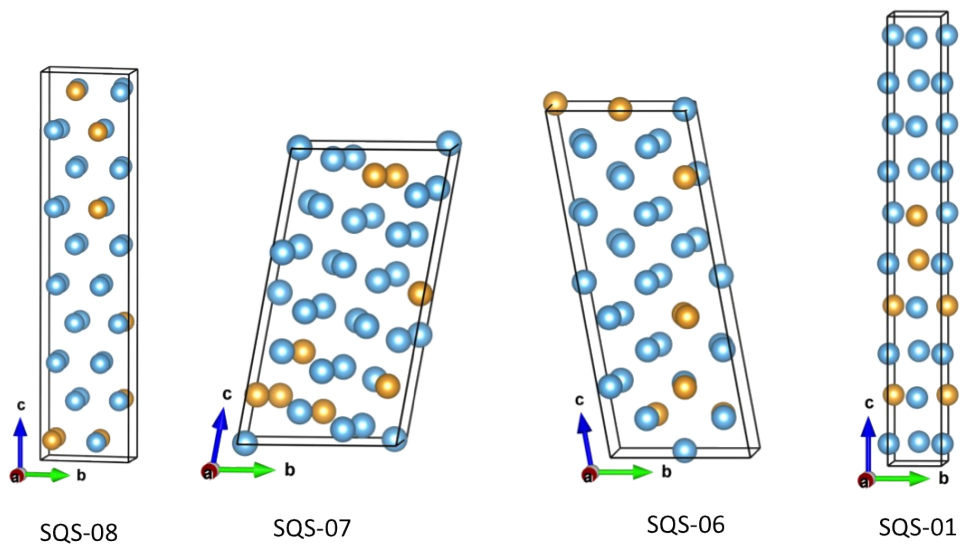

**Figure S6.** The energetically most favorable random structures from DFT computed disordered intermetallic phases using the Special Quasi-random Structures (SQS), and pseudo-random distributions in supercells in  $Ti_4Nb$  chemical system.

## Supplementary Tables

**Table S1.** Calculated elements of elastic stiffness constants ( $C_{ij}$ ) of  $\text{SiCl}_4$  type of  $\text{Ti}_4\text{Nb}$  structure modification.

| $C_{ij}$ | 1         | 2         | 3         | 4        | 5        | 6         |
|----------|-----------|-----------|-----------|----------|----------|-----------|
| 1        | 171.31132 | 77.89224  | 100.64795 | 0        | 0        | -18.52067 |
| 2        | 77.89224  | 193.51518 | 93.84969  | 0        | 0        | 13.1342   |
| 3        | 100.64795 | 93.84969  | 168.21474 | 0        | 0        | 14.22477  |
| 4        | 0         | 0         | 0         | 30.46738 | -2.79035 | 0         |
| 5        | 0         | 0         | 0         | -2.79035 | 27.4789  | 0         |
| 6        | -18.52067 | 13.1342   | 14.22477  | 0        | 0        | 52.20065  |

**Table S2.** Calculated elements of elastic stiffness constants ( $C_{ij}$ ) of  $\text{Al}_4\text{U}$  type of  $\text{Ti}_4\text{Nb}$  structure modification.

| $C_{ij}$ | 1         | 2         | 3         | 4        | 5       | 6        |
|----------|-----------|-----------|-----------|----------|---------|----------|
| 1        | 166.86316 | 90.28352  | 115.15573 | 0        | 0       | 0        |
| 2        | 90.28352  | 210.70015 | 65.34569  | 0        | 0       | 0        |
| 3        | 115.15573 | 65.34569  | 176.91473 | 0        | 0       | 0        |
| 4        | 0         | 0         | 0         | 51.71654 | 0       | 0        |
| 5        | 0         | 0         | 0         | 0        | 1.40389 | 0        |
| 6        | 0         | 0         | 0         | 0        | 0       | 40.31661 |

**Table S3.** Calculated elements of elastic stiffness constants ( $C_{ij}$ ) of  $\text{SrSn}_4$  type of  $\text{Ti}_4\text{Nb}$  structure modification.

| $C_{ij}$ | 1         | 2         | 3         | 4        | 5       | 6        |
|----------|-----------|-----------|-----------|----------|---------|----------|
| 1        | 165.90573 | 122.4832  | 86.20536  | 0        | 0       | 0        |
| 2        | 122.4832  | 171.03558 | 61.48785  | 0        | 0       | 0        |
| 3        | 86.20536  | 61.48785  | 219.61556 | 0        | 0       | 0        |
| 4        | 0         | 0         | 0         | 42.00439 | 0       | 0        |
| 5        | 0         | 0         | 0         | 0        | 9.24459 | 0        |
| 6        | 0         | 0         | 0         | 0        | 0       | 55.83283 |

**Table S4.** Calculated elements of elastic stiffness constants ( $C_{ij}$ ) of  $\text{AgAu}_4$  type of  $\text{Ti}_4\text{Nb}$  structure modification.

| $C_{ij}$ | 1         | 2         | 3         | 4      | 5        | 6        |
|----------|-----------|-----------|-----------|--------|----------|----------|
| 1        | 132.65354 | 115.49458 | 108.99595 | 0      | 0        | 0        |
| 2        | 115.49458 | 130.08758 | 114.5786  | 0      | 0        | 0        |
| 3        | 108.99595 | 114.5786  | 132.5739  | 0      | 0        | 0        |
| 4        | 0         | 0         | 0         | 57.257 | 0        | 0        |
| 5        | 0         | 0         | 0         | 0      | 56.66673 | 0        |
| 6        | 0         | 0         | 0         | 0      | 0        | 66.01973 |

**Table S5.** Calculated elements of elastic stiffness constants ( $C_{ij}$ ) of MoNi<sub>4</sub> type of Ti<sub>4</sub>Nb structure modification.

| $C_{ij}$ | 1         | 2         | 3         | 4         | 5        | 6        |
|----------|-----------|-----------|-----------|-----------|----------|----------|
| 1        | 146.22201 | 98.04278  | 113.12769 | 24.40402  | 0        | 0        |
| 2        | 98.04278  | 146.22201 | 113.12769 | -24.40402 | 0        | 0        |
| 3        | 113.12769 | 113.12769 | 133.79409 | 0         | 0        | 0        |
| 4        | 24.40402  | -24.40402 | 0         | 39.98464  | 0        | 0        |
| 5        | 0         | 0         | 0         | 0         | 57.15968 | 0        |
| 6        | 0         | 0         | 0         | 0         | 0        | 57.15968 |

**Table S6.** Calculated elements of elastic stiffness constants ( $C_{ij}$ ) of AlAu<sub>4</sub> type of Ti<sub>4</sub>Nb structure modification.

| $C_{ij}$ | 1        | 2        | 3        | 4       | 5       | 6       |
|----------|----------|----------|----------|---------|---------|---------|
| 1        | 115.9925 | 110.023  | 110.023  | 0       | 0       | 0       |
| 2        | 110.023  | 115.9925 | 110.023  | 0       | 0       | 0       |
| 3        | 110.023  | 110.023  | 115.9925 | 0       | 0       | 0       |
| 4        | 0        | 0        | 0        | 38.2506 | 0       | 0       |
| 5        | 0        | 0        | 0        | 0       | 38.2506 | 0       |
| 6        | 0        | 0        | 0        | 0       | 0       | 38.2506 |

**Table S7.** Calculated phase diagram of Ti-Nb with three stable phases (Ti, Nb, and TiNb) investigated using the Open Quantum Materials Database (OQMD) [S1,S2].

**Stable phases**

| ID   | Spacegroup | Formation Energy [eV/atom] | Stability [eV/atom] | Prototype | # of atoms | Project | Finish Time | Reference                                                                                                                                                                  |
|------|------------|----------------------------|---------------------|-----------|------------|---------|-------------|----------------------------------------------------------------------------------------------------------------------------------------------------------------------------|
| Nb   | Im-3m      | 0                          | 0                   | A2_W      | 1          | None    |             |                                                                                                                                                                            |
| Ti   | P6/mmm     | 0                          | 0                   | BiIn2     | 3          | None    |             | Chebotareva, E.s., Nuzhdina, S.g.(1973). Observation of omega-titanium in a composite hard facing alloy based on fine-grain diamonds. Fizika Metallovi Metallovedenie, 36. |
| TiNb | P21/m      | -0.008                     | 0                   |           | 12         | None    |             |                                                                                                                                                                            |

**Table S8.** Calculated phase diagram of Ti-Nb with all possible phases of pure Ti with computed negative (or slightly positive) formation energies ( $E_f$ ) explored using the Open Quantum Materials Database (OQMD). [S1,S2]

| Ti      |            |                            |                     |           |            |         |             |                                                                                                                                                                                                  |
|---------|------------|----------------------------|---------------------|-----------|------------|---------|-------------|--------------------------------------------------------------------------------------------------------------------------------------------------------------------------------------------------|
| ID      | Spacegroup | Formation Energy [eV/atom] | Stability [eV/atom] | Prototype | # of atoms | Project | Finish Time | Reference                                                                                                                                                                                        |
| 9315    | Ti         | P6/mmm                     | 0                   | 0         | BiIn2      | 3       | None        | Chebotareva, E.s., Nuzhdina, S.g.(1973). Observation of omega-titanium in a composite hard facing alloy based on fine-grain diamonds. Fizika Metallovi Metallovedenie, 36.                       |
| 2031311 | Ti         | Ibam                       | 0.003               | 0.003     |            | 6       | None        | Zarkevich, N.a., Johnson, D.d.(2016). Titanium alpha-omega phase transformation pathway and a predicted metastable structure. Physical Review, Serie 3. B - Condensed Matter (18,1978-), 93.     |
| 755845  | Ti         | P63/mmc                    | 0.014               | 0.014     |            | 24      | None        |                                                                                                                                                                                                  |
| 8079    | Ti         | P63/mmc                    | 0.014               | 0.014     | Mg         | 2       | None        | Wood, R.m.(1962). The lattice constants of high purity alpha titanium. Review of Scientific Instruments, 33.                                                                                     |
| 2016208 | Ti         | P63/mmc                    | 0.014               | 0.014     | hcp#Mg     | 2       | None        | Bulanova, M., Fartushna, I., Meleshevich, K., Samelyuk, A. (2014). Isothermal section at 850°C of the Ti - Dy - Al system in the Ti - Ti Al - Dy Al2 - Dy region. Journal of Alloys Compd., 598. |
| 52003   | Ti         | P63/mmc                    | 0.014               | 0.014     | Mg         | 2       | None        | Hull, A.w.(2002). Crystal structure of Ti and Zr. Golden Book of Phase Transitions, Wroclaw, 1.                                                                                                  |
| 755836  | Ti         | P63/mmc                    | 0.014               | 0.014     |            | 6       | None        |                                                                                                                                                                                                  |
| 755844  | Ti         | P63/mmc                    | 0.014               | 0.014     |            | 6       | None        |                                                                                                                                                                                                  |
| 755851  | Ti         | P63/mmc                    | 0.014               | 0.014     |            | 2       | None        |                                                                                                                                                                                                  |
| 755831  | Ti         | P63/mmc                    | 0.014               | 0.014     |            | 4       | None        |                                                                                                                                                                                                  |
| 755833  | Ti         | P63/mmc                    | 0.014               | 0.014     |            | 2       | None        |                                                                                                                                                                                                  |
| 755850  | Ti         | P63/mmc                    | 0.014               | 0.014     |            | 2       | None        |                                                                                                                                                                                                  |
| 755840  | Ti         | P63/mmc                    | 0.014               | 0.014     |            | 2       | None        |                                                                                                                                                                                                  |
| 1215380 | Ti         | P63/mmc                    | 0.014               | 0.014     | A3_Mg      | 2       | None        |                                                                                                                                                                                                  |
| 755821  | Ti         | P63/mmc                    | 0.014               | 0.014     |            | 4       | None        |                                                                                                                                                                                                  |
| 755848  | Ti         | Pmm2                       | 0.014               | 0.014     |            | 12      | None        |                                                                                                                                                                                                  |
| 117514  | Ti         | P63/mmc                    | 0.014               | 0.014     | Mg         | 2       | None        | Singh, R.k., Srivastava, A., Chauhan, M.(2011). Pressure induced phase transitions in transition metal nitrides: ab initio study. Physica Status Solidi, Sectio B: Basic Research, 248.          |
| 755847  | Ti         | P63/mmc                    | 0.014               | 0.014     |            | 2       | None        |                                                                                                                                                                                                  |
| 755838  | Ti         | P63/mmc                    | 0.014               | 0.014     |            | 2       | None        |                                                                                                                                                                                                  |
| 755837  | Ti         | Pmmn                       | 0.014               | 0.014     |            | 12      | None        |                                                                                                                                                                                                  |
| 755826  | Ti         | Cmcm                       | 0.014               | 0.014     |            | 4       | None        |                                                                                                                                                                                                  |
| 755846  | Ti         | Cmcm                       | 0.014               | 0.014     |            | 4       | None        |                                                                                                                                                                                                  |
| 755824  | Ti         | Cmcm                       | 0.014               | 0.014     |            | 4       | None        |                                                                                                                                                                                                  |
| 755841  | Ti         | Cmcm                       | 0.014               | 0.014     |            | 4       | None        |                                                                                                                                                                                                  |
| 755832  | Ti         | P63/mmc                    | 0.014               | 0.014     |            | 2       | None        |                                                                                                                                                                                                  |
| 755829  | Ti         | P63/mmc                    | 0.014               | 0.014     |            | 2       | None        |                                                                                                                                                                                                  |
| 117243  | Ti         | P63/mmc                    | 0.014               | 0.014     | Mg         | 2       | None        | Chattaraj, D., Parida, S.c., Majumder, C.(2011). Structural and electronic properties of U2 Ti: a first principles study. Physica B: Condensed Matter (Amsterdam, 152, 1988-), 406.              |

|         |    |         |       |       |               |    |      |                                                                                                                                                                                                                                       |
|---------|----|---------|-------|-------|---------------|----|------|---------------------------------------------------------------------------------------------------------------------------------------------------------------------------------------------------------------------------------------|
| 755823  | Ti | P63/mmc | 0.014 | 0.014 |               | 14 | None |                                                                                                                                                                                                                                       |
| 755839  | Ti | P63/mmc | 0.014 | 0.014 |               | 2  | None |                                                                                                                                                                                                                                       |
| 755842  | Ti | P63/mmc | 0.014 | 0.014 |               | 2  | None |                                                                                                                                                                                                                                       |
| 755834  | Ti | Cmcm    | 0.014 | 0.014 |               | 8  | None |                                                                                                                                                                                                                                       |
| 755835  | Ti | P63/mmc | 0.014 | 0.014 |               | 14 | None |                                                                                                                                                                                                                                       |
| 755825  | Ti | P63/mmc | 0.014 | 0.014 |               | 2  | None |                                                                                                                                                                                                                                       |
| 110171  | Ti | P63/mmc | 0.014 | 0.014 | Mg            | 2  | None | De wijs, G.a., Van setten, M.j., Er, S., Brocks, G.(2010). First-principles modelling of magnesium titanium hydrides. Journal of Physics: Condensed Matter, 22.                                                                       |
| 87084   | Ti | P63/mmc | 0.014 | 0.014 | Mg            | 2  | None | Novoselova, T., Malinov, S., Sha, W., Zhecheva, A.(2004). High-temperature synchrotron X-ray diffraction study of phases in a gamma Ti Al alloy. Materials Science and Engineering, 371.                                              |
| 755830  | Ti | P63/mmc | 0.014 | 0.014 |               | 10 | None |                                                                                                                                                                                                                                       |
| 755827  | Ti | P63/mmc | 0.014 | 0.014 |               | 10 | None |                                                                                                                                                                                                                                       |
| 755828  | Ti | Cmcm    | 0.014 | 0.014 |               | 12 | None |                                                                                                                                                                                                                                       |
| 755822  | Ti | Pm      | 0.014 | 0.014 |               | 12 | None |                                                                                                                                                                                                                                       |
| 755849  | Ti | Pm      | 0.014 | 0.014 |               | 12 | None |                                                                                                                                                                                                                                       |
| 2030140 | Ti | P63/mmc | 0.014 | 0.014 | hcp#Mg        | 2  | None | Richter, Manuel, Schoenecker, Stephan, Li, Xiaoqing, Koepfernik, Klaus, Johansson, Boerje, Vitos, Levente(2015). Metastable cubic and tetragonal phases of transition metals predicted by density-functional theory. RSC Advances, 5. |
| 1215291 | Ti | Cmcm    | 0.016 | 0.016 | A20_alpha_U   | 2  | None |                                                                                                                                                                                                                                       |
| 1216096 | Ti | R-3m    | 0.039 | 0.039 | C19_alpha_Sm  | 3  | None |                                                                                                                                                                                                                                       |
| 1214579 | Ti | Fm-3m   | 0.070 | 0.070 | A1_Cu         | 1  | None |                                                                                                                                                                                                                                       |
| 676147  | Ti | Fm-3m   | 0.070 | 0.070 |               | 1  | None | Haglund, J., Fernandez guillemet, F., Grimvall, G., Korling, M. (1993). Theory of bonding in transition-metal carbides and nitrides. Physical Review, Serie 3. B - Condensed Matter (18,1978-), 48.                                   |
| 1484872 | Ti | I4/mmm  | 0.070 | 0.070 |               | 1  | None |                                                                                                                                                                                                                                       |
| 1215737 | Ti | I4/mmm  | 0.070 | 0.070 | A6_In         | 1  | None |                                                                                                                                                                                                                                       |
| 1215915 | Ti | P3121   | 0.073 | 0.073 | A8_Se         | 3  | None |                                                                                                                                                                                                                                       |
| 1214668 | Ti | R-3m    | 0.074 | 0.074 | A10_Hg        | 1  | None |                                                                                                                                                                                                                                       |
| 8390    | Ti | Im-3m   | 0.114 | 0.114 | W             | 1  | None | Spreadborough, J., Christian, J.w.(1959). The measurement of the lattice dimensions and Debye temperatures of titanium and silver by X-ray methods. Proceedings of the Physical Society, London, 74.                                  |
| 1215202 | Ti | Im-3m   | 0.114 | 0.114 | A2_W          | 1  | None |                                                                                                                                                                                                                                       |
| 1214935 | Ti | P4132   | 0.124 | 0.124 | A13_beta_Mn   | 20 | None |                                                                                                                                                                                                                                       |
| 1215113 | Ti | Cmca    | 0.157 | 0.157 | A17_Black_P   | 4  | None |                                                                                                                                                                                                                                       |
| 1215024 | Ti | Pm-3n   | 0.193 | 0.193 | A15_beta_W    | 8  | None |                                                                                                                                                                                                                                       |
| 1280389 | Ti | Pm-3n   | 0.193 | 0.193 |               | 8  | None |                                                                                                                                                                                                                                       |
| 1577532 | Ti | I-43m   | 0.197 | 0.197 |               | 29 | None |                                                                                                                                                                                                                                       |
| 1214846 | Ti | I-43m   | 0.198 | 0.198 | A12_alpha_Mn  | 29 | None |                                                                                                                                                                                                                                       |
| 1214757 | Ti | Cmca    | 0.242 | 0.242 | A11_Ga        | 4  | None |                                                                                                                                                                                                                                       |
| 1484703 | Ti | R-3m    | 0.253 | 0.253 |               | 13 | None |                                                                                                                                                                                                                                       |
| 1485151 | Ti | Fd-3m   | 0.269 | 0.269 |               | 6  | None |                                                                                                                                                                                                                                       |
| 1485752 | Ti | P63/mmc | 0.283 | 0.283 |               | 12 | None |                                                                                                                                                                                                                                       |
| 1215648 | Ti | I41/amd | 0.405 | 0.405 | A5_Sn         | 2  | None |                                                                                                                                                                                                                                       |
| 1216004 | Ti | P63/mmc | 0.896 | 0.896 | A9_Graphite_C | 4  | None |                                                                                                                                                                                                                                       |
| 1215559 | Ti | Fd-3m   | 2.116 | 2.116 | A4_Diamond_C  | 2  | None |                                                                                                                                                                                                                                       |
| 1215826 | Ti | R-3m    | 3.159 | 3.159 | A7_As         | 2  | None |                                                                                                                                                                                                                                       |



**Table S9.** Calculated phase diagram of Ti-Nb with all possible phases of pure Nb with computed negative (or slightly positive) formation energies ( $E_f$ ) explored using the Open Quantum Materials Database (OQMD) [S1,S2].

|         |    | Nb      |       |       |              |    |      |                                                                                                                                                                                                                                                              |
|---------|----|---------|-------|-------|--------------|----|------|--------------------------------------------------------------------------------------------------------------------------------------------------------------------------------------------------------------------------------------------------------------|
| 1215170 | Nb | Im-3m   | 0     | 0     | A2_W         | 1  | None |                                                                                                                                                                                                                                                              |
| 1521870 | Nb | Im-3m   | 0     | 0     |              | 1  | None |                                                                                                                                                                                                                                                              |
| 1521875 | Nb | Im-3m   | 0     | 0     |              | 1  | None |                                                                                                                                                                                                                                                              |
| 685533  | Nb | Im-3m   | 0.000 | 0.000 |              | 1  | None | Neuberger, M.c.(1936). Praezisionsmessung der Gitterkonstante von sehr reinem Niob. Zeitschrift fuer Kristallographie, Kristallgeometrie, Kristallphysik, Kristallchemie (-144,1977), 93.                                                                    |
| 1215883 | Nb | P3121   | 0.076 | 0.076 | A8_Se        | 3  | None |                                                                                                                                                                                                                                                              |
| 1214992 | Nb | Pm-3n   | 0.105 | 0.105 | A15_beta_W   | 8  | None |                                                                                                                                                                                                                                                              |
| 1280310 | Nb | Pm-3n   | 0.105 | 0.105 |              | 8  | None |                                                                                                                                                                                                                                                              |
| 2030157 | Nb | I4/mmm  | 0.145 | 0.145 | In           | 1  | None | Richter, Manuel, Schoenecker, Stephan, Li, Xiaoqing, Koepernik, Klaus, Johansson, Boerje, Vitos, Levente(2015). Metastable cubic and tetragonal phases of transition metals predicted by density-functional theory. RSC Advances, 5.                         |
| 1215705 | Nb | I4/mmm  | 0.147 | 0.147 | A6_In        | 1  | None |                                                                                                                                                                                                                                                              |
| 1214814 | Nb | I-43m   | 0.167 | 0.167 | A12_alpha_Mn | 29 | None |                                                                                                                                                                                                                                                              |
| 2030113 | Nb | R-3m    | 0.174 | 0.174 | W6Fe7        | 13 | None | Santos, V. O. D., Petrilli, H. M., Schoen, C. G., Eleno, L. T.(2015) Thermodynamic modelling of the Nb-Ni-Si phase diagram based on the 1073 K isothermal section using ab initio calculations. Computer coupling of phase diagrams and thermochemistry, 51. |
| 1215259 | Nb | Cmcm    | 0.198 | 0.198 | A20_alpha_U  | 2  | None |                                                                                                                                                                                                                                                              |
| 1801139 | Nb | P6/mmm  | 0.202 | 0.202 |              | 3  | None |                                                                                                                                                                                                                                                              |
| 2031499 | Nb | P6/mmm  | 0.202 | 0.202 |              | 3  | None | Tanaka, Isao, Ikeda, Yuji(2016). Stability of the omega structure of transition elements. Physical Review, Serie 3. B - Condensed Matter (18,1978-), 93.                                                                                                     |
| 1214903 | Nb | P4132   | 0.213 | 0.213 | A13_beta_Mn  | 20 | None |                                                                                                                                                                                                                                                              |
| 1214636 | Nb | R-3m    | 0.268 | 0.268 | A10_Hg       | 1  | None |                                                                                                                                                                                                                                                              |
| 1215438 | Nb | P63/mmc | 0.291 | 0.291 | A3p_La       | 4  | None |                                                                                                                                                                                                                                                              |
| 1216064 | Nb | R-3m    | 0.293 | 0.293 | C19_alpha_Sm | 3  | None |                                                                                                                                                                                                                                                              |
| 2029911 | Nb | P63/mmc | 0.296 | 0.296 | hcp#Mg       | 2  | None | Zhang, X., Arroyave, R., Jurekaew, A., Ham, B.(2015). Investigation of interfaces in Mg/Nb multilayer thin films. Computational Materials Science, Elsevier, 108.                                                                                            |
| 1215348 | Nb | P63/mmc | 0.297 | 0.297 | A3_Mg        | 2  | None |                                                                                                                                                                                                                                                              |
| 1214547 | Nb | Fm-3m   | 0.322 | 0.322 | A1_Cu        | 1  | None |                                                                                                                                                                                                                                                              |
| 676151  | Nb | Fm-3m   | 0.322 | 0.322 |              | 1  | None | Haglund, J., Fernandez guillemet, F., Grimvall, G., Korling, M. (1993). Theory of bonding in transition-metal carbides and nitrides. Physical Review, Serie 3. B - Condensed Matter (18,1978-), 48.                                                          |
| 1215794 | Nb | R-3m    | 0.324 | 0.324 | A7_As        | 2  | None |                                                                                                                                                                                                                                                              |
| 1215081 | Nb | Cmca    | 0.344 | 0.344 | A17_Black_P  | 4  | None |                                                                                                                                                                                                                                                              |
| 1214725 | Nb | Cmca    | 0.442 | 0.442 | A11_Ga       | 4  | None |                                                                                                                                                                                                                                                              |
| 1215616 | Nb | I41/amd | 0.601 | 0.601 | A5_Sn        | 2  | None |                                                                                                                                                                                                                                                              |

**Table S10.** Calculated phase diagram of Ti-Nb with all possible phases of mixed Ti-Nb compounds with computed negative (or slightly positive) formation energies ( $E_f$ ) explored using the Open Quantum Materials Database (OQMD) [S1,S2].

## Compounds contained in this region of phase space

| ID           | Composition                     | Spacegroup | Formation Energy [eV/atom] | Stability [eV/atom] | Prototype         | # of atoms | Projects | Finish Time | Reference                                                                                                                                                                                                          |
|--------------|---------------------------------|------------|----------------------------|---------------------|-------------------|------------|----------|-------------|--------------------------------------------------------------------------------------------------------------------------------------------------------------------------------------------------------------------|
| <b>Nb-Ti</b> |                                 |            |                            |                     |                   |            |          |             |                                                                                                                                                                                                                    |
| 754964       | TiNb                            | P21/m      | -0.008                     | 0                   |                   | 12         | None     |             |                                                                                                                                                                                                                    |
| 754958       | TiNb                            | P21/m      | -0.007                     | 0.000               |                   | 12         | None     |             |                                                                                                                                                                                                                    |
| 754981       | Ti <sub>2</sub> Nb              | Pm         | -0.005                     | 0.001               |                   | 24         | None     |             |                                                                                                                                                                                                                    |
| 1339573      | TiNb <sub>15</sub>              | Pm-3m      | 0.001                      | 0.002               |                   | 16         | None     |             |                                                                                                                                                                                                                    |
| 754972       | Ti <sub>5</sub> Nb              | P-62m      | -0.000                     | 0.002               |                   | 6          | None     |             |                                                                                                                                                                                                                    |
| 754985       | TiNb                            | Pm         | -0.001                     | 0.006               |                   | 12         | None     |             |                                                                                                                                                                                                                    |
| 754987       | Ti <sub>3</sub> Nb              | Pmmn       | 0.003                      | 0.007               |                   | 8          | None     |             |                                                                                                                                                                                                                    |
| 754976       | TiNb                            | Pbcm       | 0.002                      | 0.010               |                   | 8          | None     |             |                                                                                                                                                                                                                    |
| 754962       | TiNb                            | Pmmn       | 0.003                      | 0.011               |                   | 16         | None     |             |                                                                                                                                                                                                                    |
| 754959       | Ti <sub>4</sub> Nb <sub>3</sub> | P21/m      | 0.005                      | 0.011               |                   | 14         | None     |             |                                                                                                                                                                                                                    |
| 754960       | TiNb                            | Pm         | 0.004                      | 0.012               |                   | 12         | None     |             |                                                                                                                                                                                                                    |
| 754967       | Ti <sub>2</sub> Nb              | Pmmn       | 0.007                      | 0.012               |                   | 12         | None     |             |                                                                                                                                                                                                                    |
| 754956       | TiNb                            | Pm         | 0.007                      | 0.015               |                   | 24         | None     |             |                                                                                                                                                                                                                    |
| 312000       | Ti <sub>3</sub> Nb              | Fm-3m      | 0.013                      | 0.017               | D0_3_BiF3         | 4          | None     |             |                                                                                                                                                                                                                    |
| 754966       | TiNb                            | Pm         | 0.010                      | 0.017               |                   | 10         | None     |             |                                                                                                                                                                                                                    |
| 313047       | TiNb <sub>3</sub>               | Fm-3m      | 0.014                      | 0.018               | D0_3_BiF3         | 4          | None     |             |                                                                                                                                                                                                                    |
| 754978       | Ti <sub>3</sub> Nb              | P21/m      | 0.017                      | 0.020               |                   | 8          | None     |             |                                                                                                                                                                                                                    |
| 754963       | TiNb                            | Pm         | 0.014                      | 0.022               |                   | 10         | None     |             |                                                                                                                                                                                                                    |
| 323589       | Ti <sub>3</sub> Nb              | P63/mmc    | 0.024                      | 0.028               | D0_19_Ni3Sn       | 8          | None     |             |                                                                                                                                                                                                                    |
| 754975       | Ti <sub>3</sub> Nb              | Cmcm       | 0.024                      | 0.028               |                   | 8          | None     |             |                                                                                                                                                                                                                    |
| 754957       | Ti <sub>2</sub> Nb              | Pmmn       | 0.023                      | 0.028               |                   | 12         | None     |             |                                                                                                                                                                                                                    |
| 301458       | Ti <sub>3</sub> Nb              | I4/mmm     | 0.027                      | 0.031               | D0_22_Al3Ti       | 4          | None     |             |                                                                                                                                                                                                                    |
| 348075       | Ti <sub>3</sub> Nb              | Pm-3m      | 0.031                      | 0.035               | L1_2_Cu3Au        | 4          | None     |             |                                                                                                                                                                                                                    |
| 2030449      | Ti <sub>3</sub> Nb              | Pm-3m      | 0.031                      | 0.035               | Auricupride#AuCu3 | 4          | None     |             | Li, Yang, Li, Jiahao, Liu, Baixin(2015). The atomistic mechanism of hcp-to-bcc martensitic transformation in the Ti-Nb system revealed by molecular dynamics simulations. Physical Chemistry Chemical Physics, 17. |
| 1221332      | TiNb                            | Pmma       | 0.031                      | 0.038               | B19_AuCd          | 4          | None     |             |                                                                                                                                                                                                                    |
| 2030450      | TiNb                            | Pm-3m      | 0.032                      | 0.040               | CsCl              | 2          | None     |             | Li, Yang, Li, Jiahao, Liu, Baixin(2015). The atomistic mechanism of hcp-to-bcc martensitic transformation in the Ti-Nb system revealed by molecular dynamics simulations. Physical Chemistry Chemical Physics, 17. |

|         |                                 |         |       |       |                     |    |      |
|---------|---------------------------------|---------|-------|-------|---------------------|----|------|
| 306941  | TiNb                            | Pm-3m   | 0.032 | 0.040 | B2_CsCl             | 2  | None |
| 1522342 | TiNb                            | Pm-3m   | 0.032 | 0.040 |                     | 2  | None |
| 754973  | Ti <sub>2</sub> Nb              | Pmmn    | 0.037 | 0.043 |                     | 12 | None |
| 754983  | TiNb                            | Pmma    | 0.038 | 0.045 |                     | 4  | None |
| 754969  | TiNb                            | Pnma    | 0.051 | 0.059 |                     | 8  | None |
| 754980  | Ti <sub>2</sub> Nb              | Amm2    | 0.062 | 0.067 |                     | 6  | None |
| 754965  | TiNb                            | Pmmn    | 0.060 | 0.068 |                     | 4  | None |
| 754984  | Ti <sub>2</sub> Nb              | Cmcm    | 0.063 | 0.069 |                     | 12 | None |
| 754961  | TiNb                            | Pmmn    | 0.066 | 0.074 |                     | 16 | None |
| 754977  | TiNb                            | Pmmn    | 0.070 | 0.077 |                     | 16 | None |
| 754986  | TiNb                            | Pmm2    | 0.078 | 0.086 |                     | 8  | None |
| 754970  | TiNb                            | Pmm2    | 0.081 | 0.089 |                     | 8  | None |
| 754971  | Ti <sub>4</sub> Nb <sub>3</sub> | Pm      | 0.094 | 0.101 |                     | 14 | None |
| 302505  | TiNb <sub>3</sub>               | I4/mmm  | 0.104 | 0.108 | D0_22_Al3Ti         | 4  | None |
| 1609956 | Ti <sub>2</sub> Nb              | P63/mmc | 0.111 | 0.116 | C14_MgZn2           | 12 | None |
| 1235901 | TiNb                            | P-6m2   | 0.114 | 0.122 |                     | 2  | None |
| 1230497 | TiNb                            | P-6m2   | 0.115 | 0.122 | B_h_WC              | 2  | None |
| 754968  | TiNb                            | Amm2    | 0.129 | 0.137 |                     | 8  | None |
| 328025  | TiNb                            | R-3m    | 0.133 | 0.141 | L1_1_CuPt           | 2  | None |
| 1590660 | Ti <sub>2</sub> Nb              | Fd-3m   | 0.144 | 0.149 | C15_MgCu2           | 6  | None |
| 338483  | TiNb                            | P4/mmm  | 0.178 | 0.185 | L1_0_CuAu           | 2  | None |
| 347028  | TiNb <sub>3</sub>               | Pm-3m   | 0.204 | 0.207 | L1_2_Cu3Au          | 4  | None |
| 2030451 | TiNb <sub>3</sub>               | Pm-3m   | 0.204 | 0.207 | Auricupride#AuCu3   | 4  | None |
| 322542  | TiNb <sub>3</sub>               | P63/mmc | 0.206 | 0.210 | D0_19_Ni3Sn         | 8  | None |
| 1609973 | TiNb <sub>2</sub>               | P63/mmc | 0.209 | 0.214 | C14_MgZn2           | 12 | None |
| 1610063 | TiNb <sub>2</sub>               | P63/mmc | 0.221 | 0.226 | C36_MgNi2           | 24 | None |
| 1520656 | TiNb <sub>2</sub>               | Pnma    | 0.228 | 0.233 |                     | 12 | None |
| 1591997 | TiNb <sub>2</sub>               | Fd-3m   | 0.230 | 0.236 | C15_MgCu2           | 6  | None |
| 428061  | Ti <sub>3</sub> Nb <sub>2</sub> | R-3c    | 0.339 | 0.345 | D5_1_Corundum_Al2O3 | 10 | None |
| 1106126 | TiNb                            | Fm-3m   | 0.795 | 0.803 | B1_NaCl             | 2  | None |
| 1233983 | TiNb <sub>2</sub>               | P42/mnm | 1.076 | 1.081 | C4_Rutile_TiO2      | 6  | None |
| 1227011 | TiNb                            | P63mc   | 1.516 | 1.524 | B4_Zincblende_ZnS   | 4  | None |
| 1223526 | TiNb                            | F-43m   | 2.388 | 2.395 | B3_Sphalerite_ZnS   | 2  | None |
| 1239221 | Ti <sub>2</sub> Nb              | Fd-3m   | 2.618 | 2.623 | C9_SiO2             | 6  | None |
| 1239222 | TiNb <sub>2</sub>               | Fd-3m   | 3.436 | 3.441 | C9_SiO2             | 6  | None |

Li, Yang, Li, Jiahao, Liu, Baixin(2015). The atomistic mechanism of hcp-to-bcc martensitic transformation in the Ti-Nb system revealed by molecular dynamics simulations. Physical Chemistry Chemical Physics, 17.

**Table S11.** Calculated formation energies of various  $Ti_4Nb$  structure types computed using GGA-PBE functional. SQS-01 corresponds to  $Ti_{16}Nb_4$ , SQS-02 to SQS-05 correspond to  $Ti_{26}Nb_6$ , SQS-06 to SQS-08 correspond  $Ti_{32}Nb_8$ , and SQS09 corresponds to  $Ti_{64}Nb_{16}$ .  $\Delta E^1$  is with reference to ground state Ti (hcp) and Nb (bcc).  $\Delta E^2$  is with reference to ground Ti state (bcc that is  $\beta$ -Ti) and Nb (bcc).

| Structure-Type    | Space Group Symmetry | Number of Atoms/prim-cell | $\Delta E^1$ meV/atom | $\Delta E^2$ meV/atom |
|-------------------|----------------------|---------------------------|-----------------------|-----------------------|
| SiCl <sub>4</sub> | <i>P21/m</i>         | 10                        | 53.8                  | -35.0                 |
| Al <sub>4</sub> U | <i>Imma</i>          | 10                        | 63.5                  | -25.3                 |
| SrSn <sub>4</sub> | <i>Cmcm</i>          | 10                        | 65.2                  | -23.6                 |
| AgAu <sub>4</sub> | <i>Cmcm</i>          | 10                        | 77.1                  | -11.7                 |
| MoNi <sub>4</sub> | <i>I4/m</i>          | 5                         | 78.6                  | -10.2                 |
| AlAu <sub>4</sub> | <i>P213</i>          | 20                        | 107.2                 | 18.4                  |
| SQS-01            | <i>Pm</i>            | 20                        | 53.7                  | -35.1                 |
| SQS-02            | <i>P1</i>            | 32                        | 50.4                  | -39.8                 |
| SQS-03            | <i>P1</i>            | 32                        | 47.7                  | -42.4                 |
| SQS-04            | <i>P1</i>            | 32                        | 46.8                  | -43.4                 |
| SQS-05            | <i>P1</i>            | 32                        | 47.2                  | -43.0                 |
| SQS-06            | <i>P1</i>            | 40                        | 49.3                  | -39.5                 |
| SQS-07            | <i>P1</i>            | 40                        | 44.8                  | -44.0                 |
| SQS-08            | <i>P1</i>            | 40                        | 42.9                  | -45.9                 |
| SQS-09            | <i>P1</i>            | 80                        | 47.9                  | -40.9                 |

## Supplementary References

[S1] Saal, J.E., Kirklin, S., Aykol, M. et al. Materials Design and Discovery with High-Throughput Density Functional Theory: The Open Quantum Materials Database (OQMD). JOM 65, 1501–1509 (2013). <https://doi.org/10.1007/s11837-013-0755-4>

[S2] Kirklin, S., Saal, J., Meredig, B. et al. The Open Quantum Materials Database (OQMD): assessing the accuracy of DFT formation energies. npj Comput Mater 1, 15010 (2015). <https://doi.org/10.1038/npjcompumats.2015.10>
